# Supplementary material for: Multi-Parametric Evaluation of Chronic Kidney Disease by MRI: A Preliminary Cross-Sectional Study
Source: PubMed Central journal article supplement (PMC4591972; doi:10.1371/journal.pone.0139661), 2015-10-02
Supplement: pone.0139661.s001.pdf [file pone.0139661.s001.pdf]

| Age at Exam | Study Code | Male/Female | Subject Type | eGFR   | R2*_Cortex | R2*_Med | Delta R2* Med | L+R Volume | ADC_cortex |
|-------------|------------|-------------|--------------|--------|------------|---------|---------------|------------|------------|
| 33.7        | NK21       | F           | Anemic       | 96     | 17.24      | 34.23   | 15.63         | 201.96     | 2255.60    |
| 41.0        | PK23       | F           | Anemic       | 111    | 17.47      | 35.19   | 11.55         | 291.88     | 2263.34    |
| 34.4        | LS24       | F           | Anemic       | 114    | 17.55      | 24.98   | 4.19          | 253.41     | 2285.70    |
| 62.5        | EL25       | F           | Anemic       | 125    | 17.38      | 31.64   | 8.38          | 331.62     | 3180.53    |
| 53.4        | MS28       | F           | Anemic       | 105    | 17.00      | 30.67   | 16.00         | 277.54     | 2301.53    |
| 44.4        | KD30       | F           | Anemic       | 91     | 16.76      | 29.39   | 9.02          | 340.10     | 2601.77    |
| 42.0        | JK47       | F           | Anemic       | 92     | 25.19      | 35.22   | -0.35         | 285.66     | 1897.77    |
| 21.8        | MJ01       | M           | Healthy      | 94     | 16.41      | 28.32   | 1.99          | 300.99     | 2156.13    |
| 29.7        | RA03       | M           | Healthy      | 88     | 18.84      | 31.99   | 10.82         | 285.93     | 2527.80    |
| 28.9        | AO04       | M           | Healthy      | 100    | 19.32      | 26.83   | 7.08          | 324.31     | 2114.00    |
| 30.0        | AT07       | M           | Healthy      | 100    | 17.03      | 36.28   | 12.08         | 346.41     | 2212.77    |
| 44.4        | DD08       | M           | Healthy      | 81     | 16.00      | 28.62   | 12.93         | 376.39     | 2419.27    |
| 46.7        | GP09       | M           | Healthy      | 104    | 26.16      | 32.49   | 7.21          | 273.07     | 2599.43    |
| 25.3        | JK14       | M           | Healthy      | 118    | 22.97      | 28.85   | 8.84          | 412.58     | 2398.57    |
| 62.0        | SA40       | M           | Healthy      | 86     | 20.00      | 22.09   | 3.05          | 386.38     | 1763.79    |
| 51.2        | BJ42       | M           | Healthy      | 79     | 22.01      | 37.49   | 10.92         | 453.07     | 1911.53    |
| 47.7        | TF43       | F           | Healthy      | 67     | 26.47      | 30.71   | 3.01          | 242.34     | 1977.40    |
| 62          | CF505      | F           | Healthy      | 93.75  | 20.43      | 33.08   | 6.70          | 283.64     | 1595.98    |
| 53          | DF509      | M           | Healthy      | 92.41  | 18.58      | 28.61   | 2.40          | 292.25     | 1647.02    |
| 55          | DH507      | M           | Healthy      | 111.56 | 14.54      | 27.90   | 8.14          | 405.88     | 1741.52    |
| 57          | FW215      | F           | Healthy      | 77.15  | 16.95      | 28.31   | 5.13          |            | 1710.37    |
| 73          | MA502      | F           | Healthy      | 89.45  | 24.09      | 26.11   | 5.28          | 234.04     | 1709.39    |
| 51          | MB206      | F           | Healthy      | 88.02  | 18.71      | 33.39   | 4.31          |            | 1807.59    |
| 72          | MH501      | F           | Healthy      | 94.86  | 20.97      | 32.32   | 8.70          | 250.43     | 1564.21    |
| 58          | PK503      | M           | Healthy      | 104.64 | 17.99      | 31.39   | 7.55          | 392.16     | 1587.17    |
| 53          | PP506      | M           | Healthy      | 103.06 | 21.36      | 33.39   | 8.62          | 255.63     | 1583.56    |
| 59          | SS508      | M           | Healthy      | 93.16  | 16.72      | 33.81   | 8.60          | 371.80     | 1642.71    |
| 51          | TF220      | F           | Healthy      | 68.48  | 19.14      | 22.64   | 1.23          |            | 1766.52    |
| 76          | TT504      | M           | Healthy      | 83.44  | 18.22      | 27.78   | 7.88          | 375.63     | 1592.51    |
| 73.1        | JK05       | F           | Patient      | 8      | 19.61      | 16.26   | 2.25          | 166.38     | 2477.87    |
| 68.2        | JS10       | F           | Patient      | 28     | 22.34      | 33.97   | -0.89         | 197.67     | 1928.53    |
| 56.4        | AB11       | M           | Patient      | 64     | 19.74      | 20.16   | -5.48         | 448.67     | 2023.30    |
| 68.0        | ML13       | M           | Patient      | 32     | 19.99      | 31.68   | 8.40          | 267.21     | 2434.33    |
| 60.5        | NS15       | F           | Patient      | 38     | 20.64      | 20.86   | 0.47          | 204.41     | 2314.97    |

|      |      |   |         |       |       |       |        |        |         |
|------|------|---|---------|-------|-------|-------|--------|--------|---------|
| 59.0 | PJ16 | M | Patient | 16    | 18.64 | 27.26 | 9.95   | 220.97 | 2276.87 |
| 60.7 | KT20 | F | Patient | 46    | 28.54 | 35.22 | 9.31   | 152.90 | 3070.83 |
| 37.7 | JH26 | F | Patient | 85    | 17.86 | 28.02 | 9.20   | 329.63 | 0.00    |
| 80.2 | SM31 | M | Patient | 17    | 15.95 | 13.52 | -6.00  | 370.79 | 2280.21 |
| 55.9 | AC32 | F | Patient | 65    | 15.49 | 24.98 | 2.34   | 275.74 | 1632.23 |
| 57.5 | RN33 | M | Patient | 52    | 17.17 | 28.40 | 7.09   | 330.11 | 1756.13 |
| 52.3 | SY34 | F | Patient | 34    | 21.66 | 35.86 | 11.72  | 257.53 | 1628.95 |
| 53.2 | AW35 | F | Patient | 34    | 25.18 | 27.80 | 3.24   | 173.01 | 1627.13 |
| 52.8 | AJ36 | F | Patient | 71    | 20.27 | 26.92 | -3.90  | 284.34 | 2439.93 |
| 42.6 | RE38 | F | Patient | 10    | 38.64 | 27.36 | -15.81 | 140.03 | 1599.97 |
| 82.0 | LG39 | M | Patient | 23    | 21.87 | 28.58 | 1.68   | 283.77 | 1638.47 |
| 55.9 | NO41 | F | Patient | 33    | 15.69 | 19.48 | -10.45 | 201.90 | 0.00    |
| 55.4 | GF44 | M | Patient | 69    | 30.55 | 31.75 | 4.67   | 306.66 | 1847.10 |
| 65.2 | DF45 | M | Patient | 30    | 28.23 | 34.67 | -0.58  | 324.19 | 1576.24 |
| 71.0 | SC46 | M | Patient | 40    | 31.93 | 32.39 | 11.78  | 192.18 | 1929.53 |
| 64.3 | MN48 | M | Patient | 18    | 23.49 | 36.58 | 7.83   | 190.79 | 1681.60 |
| 63.1 | CB49 | M | Patient | 71    | 33.02 | 32.27 | 0.31   | 429.65 | 1610.70 |
| 82.2 | LR50 | F | Patient | 29    | 37.31 | 40.10 | 13.33  | 165.65 | 1719.74 |
| 66.2 | CK51 | F | Patient | 21.03 | 18.76 | 24.57 | -0.10  |        | 1730.00 |
| 68.4 | SD52 | F | Patient | 34.75 | 19.71 | 31.08 | -2.95  |        | 1594.50 |
| 67.1 | RS53 | M | Patient | 93.72 | 24.05 | 32.07 | 6.30   |        | 1796.96 |
| 56.8 | JP54 | M | Patient | 69.43 | 18.99 | 36.25 | 5.92   |        | 1655.73 |
| 56.6 | DC55 | M | Patient | 55.92 | 19.77 | 27.51 | 2.77   |        | 1725.97 |
| 54.2 | MB56 | M | Patient | 66.48 | 27.72 | 39.69 | 19.46  |        | 1849.57 |

|      |      |   |         |   |       |             |      |        |         |
|------|------|---|---------|---|-------|-------------|------|--------|---------|
| 64.2 | NG18 | F | Patient | 9 | 44.30 | 40.58265929 | 5.22 | 169.43 | 2092.40 |
|------|------|---|---------|---|-------|-------------|------|--------|---------|

Not used  
in analysis
